# Supplementary material for: Ab initio electronic structures and total internal partition sums of FeH+/2+
Source: Royal Society of Chemistry journal article supplement (doi:10.1039/d4cp03296a), 2024-12-04
Supplement: d4cp03296a1.pdf [file d4cp03296a1.pdf]

Electronic Supplementary Information

*Ab initio* electronic structures and total internal partition sums of  
 $\text{FeH}^{+}/2^{+}$

Isuru R. Ariyaratna\*, Jeffery A. Leiding, Amanda J. Neukirch, and Mark C. Zammit

*Physics and Chemistry of Materials (T-1), Los Alamos National Laboratory, Los Alamos, NM 87545, USA*

*\*isuru@lanl.gov*

**Contents**

|                                                                                                                      |            |
|----------------------------------------------------------------------------------------------------------------------|------------|
| <b>Figure S1</b> Molecular orbitals of $\text{FeH}^{+}$                                                              | Page S2    |
| <b>Figure S2</b> Total $\mu$ of $\text{FeH}^{+}$ ( $1^5\Delta$ ) under various functionals of DFT                    | Page S2    |
| <b>Table S1</b> Total $\mu$ of $\text{FeH}^{+}$ ( $1^5\Delta$ ) under DFT and % DFT errors compared to CCSD(T) $\mu$ | Page S3    |
| <b>Table S2</b> Total internal partition function sum (TIPS) fit coefficients of $\text{FeH}^{+}$                    | Page S3    |
| <b>Table S3</b> Total internal partition function sum (TIPS) fit coefficients of $\text{FeH}^{2+}$                   | Page S4    |
| <b>Table S4</b> Absolute energies of the electronic states of the $\text{FeH}^{+}$                                   | Page S5-S6 |
| <b>Table S5</b> Absolute energies and the spectroscopic parameters of $\text{FeH}^{+}$ at CAS(8,7)                   | Page S6    |
| <b>Table S6</b> Absolute energies of the electronic states of the $\text{FeH}^{2+}$                                  | Page S7    |

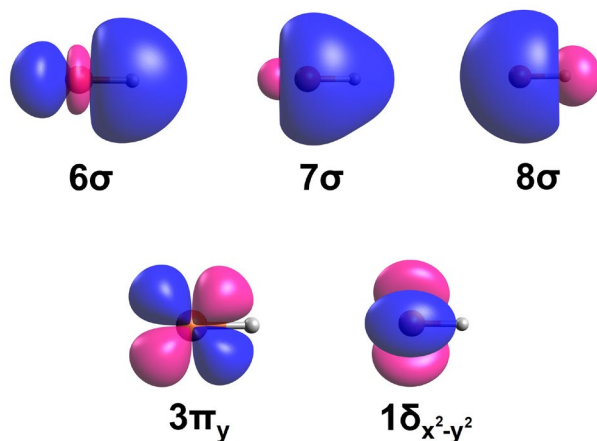

**Figure S1.** Select stage average CASSCF molecular orbitals of FeH<sup>+</sup> under an isovalue of 0.02 e/Å<sup>3</sup>. The Fe (left atom) and H (right atom) of each orbital plot are shown in orange and gray colors, respectively. The 90° and 45° rotations of 3π<sub>y</sub> and 1δ<sub>x<sup>2</sup>-y<sup>2</sup></sub> respectively yield 3π<sub>x</sub> and 1δ<sub>xy</sub> orbitals. Avogadro visualization software was utilized to plot molecular orbitals.<sup>1,2</sup> Molecular orbitals of FeH<sup>2+</sup> are qualitatively similar.

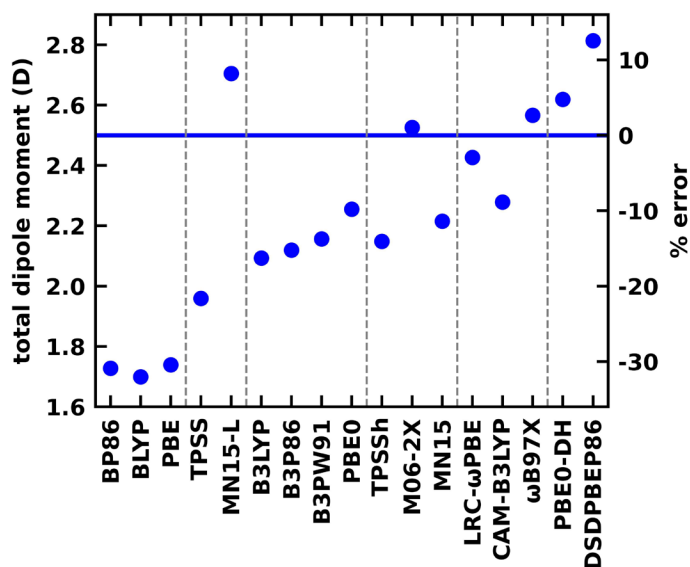

**Figure S2.** Total  $\mu$  (D) of FeH<sup>+</sup> (1<sup>5</sup> $\Delta$ ) under various of DFT functionals at the AQZ basis set (blue dots). Each class of density functional is separated with vertical gray dashed lines (i.e., left to right: GGA, MGGA, global GGA hybrid, MGGA hybrid, RSH, and DH). The blue horizontal line represents the AQZ-CCSD(T) total  $\mu$  of FeH (a<sup>6</sup> $\Delta$ ). The % DFT errors are calculated with respect to the AQZ-CCSD(T) total  $\mu$ .

**Table S1.** Total  $\mu$  (D) of FeH<sup>+</sup> ( $1^5\Delta$ ) under various of DFT functionals at the AQZ basis set and % DFT errors of  $\mu$  with respect to the AQZ-CCSD(T)  $\mu$ .

| Family of functional | DFA               | $\mu$ | % DFT error of $\mu$ |
|----------------------|-------------------|-------|----------------------|
| GGA                  | BP86              | 1.73  | -30.9                |
|                      | BLYP              | 1.70  | -32.0                |
|                      | PBE               | 1.74  | -30.4                |
| MGGA                 | TPSS              | 1.96  | -21.6                |
|                      | MN15-L            | 2.70  | 8.2                  |
| Global GGA Hybrid    | B3LYP             | 2.09  | -16.3                |
|                      | B3P86             | 2.12  | -15.2                |
|                      | B3PW91            | 2.16  | -13.7                |
|                      | PBE0              | 2.25  | -9.8                 |
| MGGA Hybrid          | TPSSh             | 2.15  | -14.1                |
|                      | M06-2X            | 2.53  | 1.0                  |
|                      | MN15              | 2.21  | -11.4                |
| RSH                  | LRC- $\omega$ PBE | 2.43  | -2.9                 |
|                      | CAM-B3LYP         | 2.28  | -8.9                 |
|                      | $\omega$ B97X     | 2.57  | 2.6                  |
| DH                   | PBE0-DH           | 2.62  | 4.7                  |
|                      | DSDPBEP86         | 2.81  | 12.5                 |

**Table S2.** The FeH<sup>+</sup> total internal partition function sum (TIPS) fit coefficients.

| TIPS fit coefficient | $N = 17$    |
|----------------------|-------------|
| $a_0$                | 71.50708320 |
| $a_1$                | 4.80121537  |
| $a_2$                | -2.27804388 |
| $a_3$                | 0.07133026  |
| $a_4$                | 1.63147380  |
| $a_5$                | -1.06112301 |
| $a_6$                | -3.13026361 |
| $a_7$                | 3.63199386  |
| $a_8$                | 4.53048612  |
| $a_9$                | -8.22442788 |
| $a_{10}$             | -1.54371893 |
| $a_{11}$             | 9.43631754  |
| $a_{12}$             | -4.29681202 |
| $a_{13}$             | -3.12628672 |
| $a_{14}$             | 3.79299826  |
| $a_{15}$             | -1.40973241 |
| $a_{16}$             | 0.18795683  |

**Table S3.** The FeH<sup>2+</sup> total internal partition function sum (TIPS) fit coefficients.

| TIPS fit coefficient | $N = 19$     |
|----------------------|--------------|
| $a_0$                | 34.63325950  |
| $a_1$                | 5.53542111   |
| $a_2$                | -1.53688247  |
| $a_3$                | -1.37361292  |
| $a_4$                | -0.47721383  |
| $a_5$                | 0.58839798   |
| $a_6$                | 2.34014731   |
| $a_7$                | 1.35141182   |
| $a_8$                | -5.99708788  |
| $a_9$                | -2.47014607  |
| $a_{10}$             | 11.17570580  |
| $a_{11}$             | -1.82504878  |
| $a_{12}$             | -10.85150190 |
| $a_{13}$             | 7.88059971   |
| $a_{14}$             | 1.92195008   |
| $a_{15}$             | -4.95239797  |
| $a_{16}$             | 2.63275208   |
| $a_{17}$             | -0.63054239  |
| $a_{18}$             | 0.05934423   |

**Table S4.** MRCI and MRCI+Q absolute energies of FeH<sup>+</sup> (Hartree).

| State                         | Level of theory | Absolute energy |
|-------------------------------|-----------------|-----------------|
| X <sup>5</sup> Δ              | AQZ-MRCI        | -1262.963065    |
|                               | AQZ-MRCI+Q      | -1262.968459    |
|                               | AQZ-DK-MRCI     | -1271.843978    |
|                               | AQZ-DK-MRCI+Q   | -1271.849433    |
| A <sup>5</sup> Π              | AQZ-MRCI        | -1262.959565    |
|                               | AQZ-MRCI+Q      | -1262.965164    |
|                               | AQZ-DK-MRCI     | -1271.841474    |
|                               | AQZ-DK-MRCI+Q   | -1271.847125    |
| B <sup>5</sup> Σ <sup>+</sup> | AQZ-MRCI        | -1262.943011    |
|                               | AQZ-MRCI+Q      | -1262.949144    |
|                               | AQZ-DK-MRCI     | -1271.827108    |
|                               | AQZ-DK-MRCI+Q   | -1271.833302    |
| a <sup>3</sup> Σ <sup>-</sup> | AQZ-MRCI        | -1262.918317    |
|                               | AQZ-MRCI+Q      | -1262.922398    |
|                               | AQZ-DK-MRCI     | -1271.794089    |
|                               | AQZ-DK-MRCI+Q   | -1271.798299    |
| b <sup>3</sup> Φ              | AQZ-MRCI        | -1262.913695    |
|                               | AQZ-MRCI+Q      | -1262.917542    |
|                               | AQZ-DK-MRCI     | -1271.789777    |
|                               | AQZ-DK-MRCI+Q   | -1271.793748    |
| c <sup>3</sup> Π              | AQZ-MRCI        | -1262.908864    |
|                               | AQZ-MRCI+Q      | -1262.912771    |
|                               | AQZ-DK-MRCI     | -1271.785418    |
|                               | AQZ-DK-MRCI+Q   | -1271.789462    |
| d <sup>3</sup> Δ              | AQZ-MRCI        | -1262.894435    |
|                               | AQZ-MRCI+Q      | -1262.898117    |
|                               | AQZ-DK-MRCI     | -1271.772146    |
|                               | AQZ-DK-MRCI+Q   | -1271.775985    |
| 1 <sup>5</sup> Σ <sup>-</sup> | AQZ-MRCI        | -1262.881440    |
|                               | AQZ-MRCI+Q      | -1262.884429    |
| 1 <sup>5</sup> Φ              | AQZ-MRCI        | -1262.880513    |
|                               | AQZ-MRCI+Q      | -1262.883387    |
| 2 <sup>5</sup> Π              | AQZ-MRCI        | -1262.879304    |
|                               | AQZ-MRCI+Q      | -1262.882227    |
| 2 <sup>5</sup> Δ              | AQZ-MRCI        | -1262.877123    |
|                               | AQZ-MRCI+Q      | -1262.879955    |
| 1 <sup>3</sup> H              | AQZ-MRCI        | -1262.870627    |
|                               | AQZ-MRCI+Q      | -1262.874930    |
| 2 <sup>3</sup> Π              | AQZ-MRCI        | -1262.869245    |
|                               | AQZ-MRCI+Q      | -1262.872765    |
| 1 <sup>1</sup> Γ              | AQZ-MRCI        | -1262.866401    |
|                               | AQZ-MRCI+Q      | -1262.870043    |
| 1 <sup>1</sup> Σ <sup>-</sup> | AQZ-MRCI        | -1262.865878    |
|                               | AQZ-MRCI+Q      | -1262.869487    |
| 1 <sup>3</sup> Γ              | AQZ-MRCI        | -1262.864987    |
|                               | AQZ-MRCI+Q      | -1262.868497    |
| 2 <sup>3</sup> Δ              | AQZ-MRCI        | -1262.864924    |
|                               | AQZ-MRCI+Q      | -1262.868427    |
| 2 <sup>3</sup> Σ <sup>-</sup> | AQZ-MRCI        | -1262.864041    |
|                               | AQZ-MRCI+Q      | -1262.867701    |
| 3 <sup>3</sup> Π              | AQZ-MRCI        | -1262.860868    |
|                               | AQZ-MRCI+Q      | -1262.864533    |
| 3 <sup>3</sup> Σ <sup>-</sup> | AQZ-MRCI        | -1262.859958    |
|                               | AQZ-MRCI+Q      | -1262.864033    |
| 1 <sup>1</sup> Π              | AQZ-MRCI        | -1262.858369    |
|                               | AQZ-MRCI+Q      | -1262.861936    |
| 2 <sup>3</sup> Φ              | AQZ-MRCI        | -1262.855896    |

|                               |            |              |
|-------------------------------|------------|--------------|
|                               | AQZ-MRCI+Q | -1262.859629 |
| 3 <sup>3</sup> Δ              | AQZ-MRCI   | -1262.851196 |
|                               | AQZ-MRCI+Q | -1262.855018 |
| 3 <sup>5</sup> Δ              | AQZ-MRCI   | -1262.850320 |
|                               | AQZ-MRCI+Q | -1262.853786 |
| 3 <sup>5</sup> Π              | AQZ-MRCI   | -1262.850093 |
|                               | AQZ-MRCI+Q | -1262.853493 |
| 2 <sup>5</sup> Σ <sup>+</sup> | AQZ-MRCI   | -1262.849440 |
|                               | AQZ-MRCI+Q | -1262.852711 |
| 1 <sup>1</sup> Φ              | AQZ-MRCI   | -1262.845280 |
|                               | AQZ-MRCI+Q | -1262.848893 |

**Table S5.** Absolute energy (Hartree), adiabatic dissociation energy with respect to the Fe<sup>+</sup>(<sup>6</sup>D)+H(<sup>2</sup>S) fragments  $D_e$  (kcal/mol), bond length  $r_e$  (Å), excitation energy  $T_e$  (cm<sup>-1</sup>), harmonic vibrational frequency  $\omega_e$  (cm<sup>-1</sup>), anharmonicity  $\omega_e x_e$  (cm<sup>-1</sup>), equilibrium rotational constant  $B_e$  (cm<sup>-1</sup>), anharmonic correction to the rotational constant  $\alpha_e$  (cm<sup>-1</sup>), and centrifugal distortion constant  $\bar{D}_e$  (cm<sup>-1</sup>) at the equilibrium distance of the 4 low-lying electronic states of FeH<sup>+</sup> under the CAS(8,7).

| State                         | Level of theory | Absolute energy | $D_e$ | $r_e$ | $T_e$ | $\omega_e$ | $\omega_e x_e$ | $B_e$ | $\alpha_e$ | $\bar{D}_e$ |
|-------------------------------|-----------------|-----------------|-------|-------|-------|------------|----------------|-------|------------|-------------|
| X <sup>5</sup> Δ              | AQZ-DK-MRCI     | -1271.832705    | 49.73 | 1.587 | ...   | 1843       | 39.7           | 6.773 | 0.2060     | 0.000376    |
|                               | AQZ-DK-MRCI+Q   | -1271.844056    | 53.14 | 1.578 | ...   | 1905       | 44.9           | 6.842 | 0.1939     | 0.000371    |
| A <sup>5</sup> Π              | AQZ-DK-MRCI     | -1271.829976    | 48.02 | 1.563 | 599   | 1827       | 48.5           | 6.916 | 0.2481     | 0.000399    |
|                               | AQZ-DK-MRCI+Q   | -1271.841371    | 51.45 | 1.558 | 589   | 1906       | 66.3           | 6.999 | 0.2329     | 0.000409    |
| B <sup>5</sup> Σ <sup>+</sup> | AQZ-DK-MRCI     | -1271.816596    | 39.62 | 1.630 | 3536  | 1640       | 25.8           | 6.420 | 0.2364     | 0.000382    |
|                               | AQZ-DK-MRCI+Q   | -1271.828277    | 43.23 | 1.616 | 3463  | 1734       | 35.3           | 6.539 | 0.2548     | 0.000371    |
| a <sup>3</sup> Σ <sup>-</sup> | AQZ-DK-MRCI     | -1271.771173    | 11.12 | 1.458 | 13505 | 2199       | 36.1           | 7.981 | 0.1305     | 0.000415    |
|                               | AQZ-DK-MRCI+Q   | -1271.785507    | 16.40 | 1.443 | 12850 | 2257       | 37.4           | 8.137 | 0.1279     | 0.000392    |

**Table S6.** MRCI and MRCI+Q absolute energies of FeH<sup>2+</sup> (Hartree).

| State                       | Level of theory | Absolute energy |
|-----------------------------|-----------------|-----------------|
| <sup>4</sup> Π              | AQZ-MRCI        | -1262.336777    |
|                             | AQZ-MRCI+Q      | -1262.337981    |
|                             | AQZ-DK-MRCI     | -1271.212750    |
|                             | AQZ-DK-MRCI+Q   | -1271.213988    |
| <sup>4</sup> Δ              | AQZ-MRCI        | -1262.336163    |
|                             | AQZ-MRCI+Q      | -1262.337271    |
|                             | AQZ-DK-MRCI     | -1271.211928    |
|                             | AQZ-DK-MRCI+Q   | -1271.213062    |
| <sup>6</sup> Σ <sup>+</sup> | AQZ-MRCI        | -1262.332069    |
|                             | AQZ-MRCI+Q      | -1262.333232    |
|                             | AQZ-DK-MRCI     | -1271.209770    |
|                             | AQZ-DK-MRCI+Q   | -1271.211012    |
| <sup>6</sup> Δ              | AQZ-MRCI        | -1262.330509    |
|                             | AQZ-MRCI+Q      | -1262.331466    |
|                             | AQZ-DK-MRCI     | -1271.206647    |
|                             | AQZ-DK-MRCI+Q   | -1271.207626    |
| <sup>6</sup> Π              | AQZ-MRCI        | -1262.329312    |
|                             | AQZ-MRCI+Q      | -1262.330293    |
|                             | AQZ-DK-MRCI     | -1271.205575    |
|                             | AQZ-DK-MRCI+Q   | -1271.206589    |
| <sup>4</sup> Σ <sup>+</sup> | AQZ-MRCI        | -1262.322967    |
|                             | AQZ-MRCI+Q      | -1262.323980    |
|                             | AQZ-DK-MRCI     | -1271.198810    |
|                             | AQZ-DK-MRCI+Q   | -1271.199861    |

## References

<sup>1</sup> M. D. Hanwell *et al.*, J Cheminform **4** (2012) 17.

<sup>2</sup> *Avogadro: an open-source molecular builder and visualization tool*, Version 1.2.0.
